# Supplementary material for: Oncostatin M suppresses metastasis of lung adenocarcinoma by inhibiting SLUG expression through coordination of STATs and PIASs signalings
Source: PubMed Central journal article supplement (PMC5312391; doi:10.18632/oncotarget.10939), 2016-07-29
Supplement: oncotarget-07-60395-s001.pdf [file oncotarget-07-60395-s001.pdf]

# Oncostatin M suppresses metastasis of lung adenocarcinoma by inhibiting SLUG expression through coordination of STATs and PIASs signalings

## SUPPLEMENTARY FIGURE AND TABLES

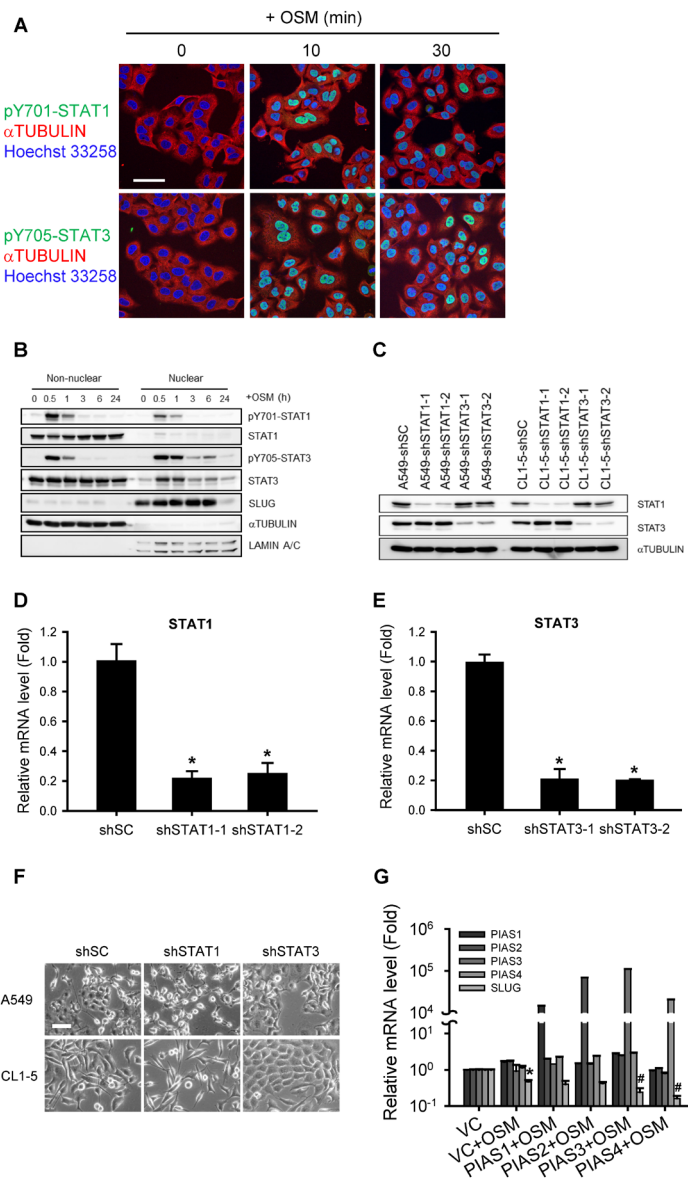

**Supplementary Figure S1:** **A.** A549 cells were treated with 20 ng/mL OSM for the indicated durations were subjected to immunofluorescent staining of pY701-STAT1 (green), pY705-STAT3 (green),  $\alpha$ TUBULIN (red) and Hoechst 33258 (blue), and observed by confocal microscope. pY701-STAT1 and pY705-STAT3 indicated the phosphorylated STAT1 and STAT3, respectively. Scale bar = 50  $\mu$ m. **B.** CL1-5 cells were treated with 20 ng/mL OSM for the indicated durations. Cell lysates were collected and use NE-PER Kit to extract the nuclear and cytoplasmic protein fractions. The protein extracts were subjected to Western blotting assay. (C to E) A549 and CL1-5 cells were stably knocked down STAT1 (shSTAT1-1 and -2) and STAT3 (shSTAT3-1 and -2) as well as cells with scrambled shRNA control (shSC), then subjected to a Western blotting (C) or a real-time PCR (D and E) for analysis of STAT1 or STAT3 protein and mRNA level, respectively. **F.** The morphology of A549 and CL1-5 cells with shSC, shSTAT1, and shSTAT3 were observed under optical microscope. Scale bar = 50  $\mu$ m. **G.** A549 cells were transfected with vector control (VC) or PIAS1 to 4-expressing plasmid, and then treated without or with OSM (20 ng/mL). The PIAS and SLUG mRNA level were analyzed by quantitative real-time PCR. An asterisk (\*) indicated the difference between experimental group and VC without OSM are statistically significant; A hash mark (#) indicated the difference between experimental group and VC with OSM are statistically significant.

Supplementary Table S1: List of antibodies used in the report

| Target                             | Supplier       | Catalog number | Appilication |
|------------------------------------|----------------|----------------|--------------|
| STAT1                              | Cell Signaling | 9175           | IF, WB       |
| STAT3                              | Cell Signaling | 12640          | IF, WB, ChIP |
| phospho-Y701-STAT1                 | Cell Signaling | 9167           | WB           |
| phospho-Y705-STAT3                 | Cell Signaling | 9145           | WB           |
| PIAS3                              | Cell Signaling | 9042           | WB, ChIP     |
| PIAS4                              | Cell Signaling | 4392           | WB, ChIP     |
| SLUG                               | Cell Signaling | 9585           | WB           |
| HDAC1                              | Cell Signaling | 5356           | WB           |
| HDAC2                              | Cell Signaling | 5113           | WB           |
| HDAC3                              | Santa Cruz     | sc-11417       | WB           |
| E-cadherin                         | BD Biosciences | 610181         | WB           |
| $\alpha$ -Tubulin                  | Sigma-Aldrich  | T6074          | IF, WB       |
| Lamin A/C                          | Cell Signaling | 2032           | WB           |
| STAT1                              | Santa Cruz     | sc-346X        | ChIP         |
| H3K9Ac                             | GeneTex        | GTX61103       | ChIP         |
| GAPDH                              | Cell Signaling | 5174           | WB           |
| Dylight549-labeled anti-mouse IgG  | Rockland       | 610-742-124    | IF           |
| Dylight488-labeled anti-rabbit IgG | Biolegend      | 406404         | IF           |
| HRP-conjugated anti-rabbit IgG     | Genetex        | 225856         | IP-WB        |
| HRP-conjugated anti-mouse IgG      | Genetex        | 225857         | IP-WB        |

Supplementary Table S2: List of primer and shRNA sequences used in the report

| Target            | sequence                                                         | application   |
|-------------------|------------------------------------------------------------------|---------------|
| STAT1             | Forward: ACTTCCCTGACATCATTCGCA<br>Reverse: GAGCAGGTTGTCTGTGGTCTG | Real-time PCR |
| STAT3             | Forward: AGACCCAGATCCAGTCCGTG<br>Reverse: TTGGTCTTCAGGTATGGGGCA  | Real-time PCR |
| PIAS3             | Forward: CGGAGCTGGGCGAATTAAG<br>Reverse: TTCCGTCCACTCTTGTTCCG    | Real-time PCR |
| PIAS4             | Forward: TAAACGGACTGGGACGGTTG<br>Reverse: TCAACTCCACCTGTCTTGGC   | Real-time PCR |
| SLUG-535          | Forward: CAGAGTCCCAGGAGAGCGTC<br>Reverse: GGCATCTGGAGAGGTTTGCC   | ChIP-qPCR     |
| SLUG-151          | Forward: AAAACAGCCCATTTTGAACCA<br>Reverse: GATTCAGCTCCTCCCTCTGG  | ChIP-qPCR     |
| STAT1 (shSTAT1-1) | CTGGAAGATTTACAAGATGAA                                            | shRNA         |
| STAT1 (shSTAT1-2) | CTGGAAGATTTACAAGATGAA                                            | shRNA         |
| STAT3 (shSTAT3-1) | GCAAAGAATCACATGCCACTT                                            | shRNA         |
| STAT3 (shSTAT3-2) | GCACAATCTACGAAGAATCAA                                            | shRNA         |
| PIAS3 (shPIAS3-1) | CCGACATCCAAGGTTTAGATT                                            | shRNA         |
| PIAS3 (shPIAS3-2) | ATCTGAGTTCGGACGGAATTA                                            | shRNA         |
| PIAS4 (shPIAS4-1) | CACCGAATTAGTCCCACAGAA                                            | shRNA         |
| PIAS4 (shPIAS4-2) | GCTCTACGGAAAGTACTTAAA                                            | shRNA         |
